# Supplementary material for: How non-aqueous media direct the reaction of Ca(OH)2 with CO2 to different forms of CaCO3: operando mid-infrared and X-ray absorption spectroscopy studies
Source: Royal Society of Chemistry journal article supplement (doi:10.1039/d4cp04774e), 2025-01-01
Supplement: d4cp04774e1.pdf [file d4cp04774e1.pdf]

# How non-aqueous media direct the reaction of $\text{Ca}(\text{OH})_2$ with $\text{CO}_2$ to different forms of $\text{CaCO}_3$ : operando mid-infrared and X-ray absorption spectroscopy studies

*Thokozile A. Kathyola,<sup>a,b</sup> Sin-Yuen Chang,<sup>b</sup> Elizabeth A. Willneff,<sup>c</sup> Colin J. Willis,<sup>d</sup> Giannantonio Cibir,<sup>b</sup> Paul Wilson,<sup>d</sup> Anna B. Kroner,<sup>b</sup> Elizabeth J. Shotton,<sup>b</sup> Peter J. Dowding,<sup>d</sup> and Sven L.M. Schroeder<sup>\*a,b</sup>*

<sup>a</sup>School of Chemical and Process Engineering, University of Leeds, Leeds. LS2 9JT, UK

<sup>b</sup>Diamond Light Source, Didcot, Oxfordshire, OX11 0DE, UK

<sup>c</sup>School of Design, University of Leeds, Leeds, LS2 9JT, UK

<sup>d</sup>Infineum UK Limited, Abingdon, Oxfordshire, OX13 6BB, UK

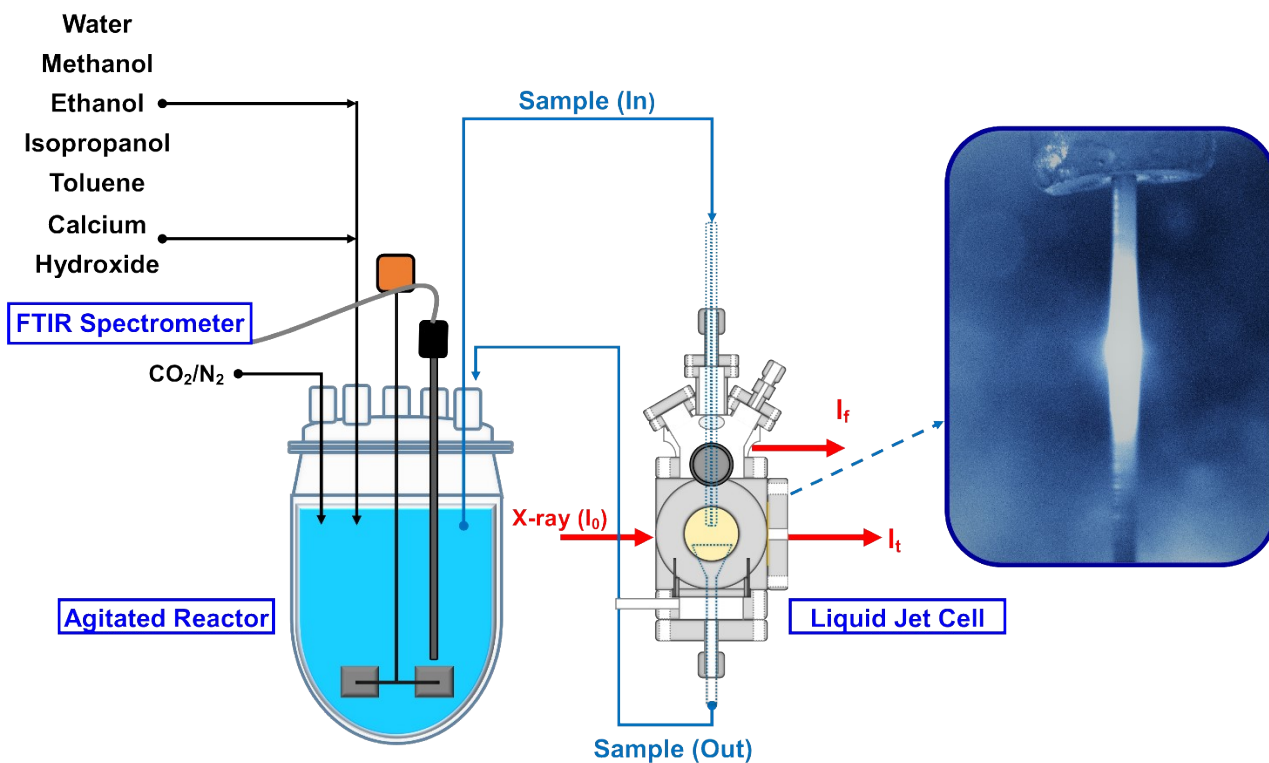

**Figure S1.** Simplified schematic of the continuous-flow liquid-jet PAT experimental setup for simultaneous *operando* mid-IR and XAS measurements.<sup>1, 2</sup>

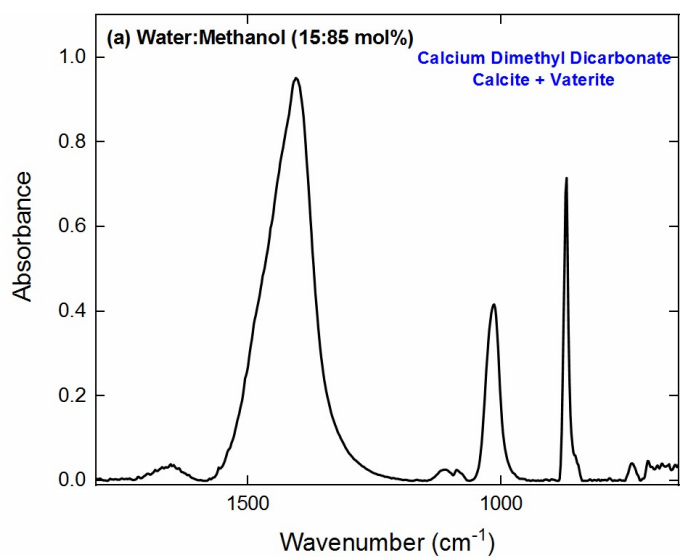

**Figure S2.** Mid-IR of the aged post-carbonation product for the water-methanol system.

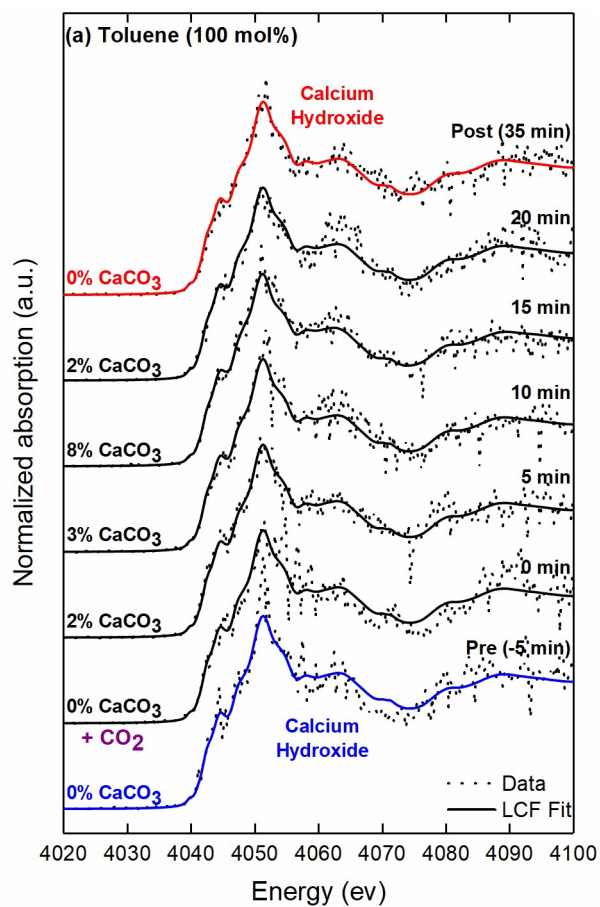

**Figure S3.** Time-resolved Ca K-edge XANES of the 20-minute carbonation of  $\text{Ca}(\text{OH})_2$  in pure toluene – no conversion observed.

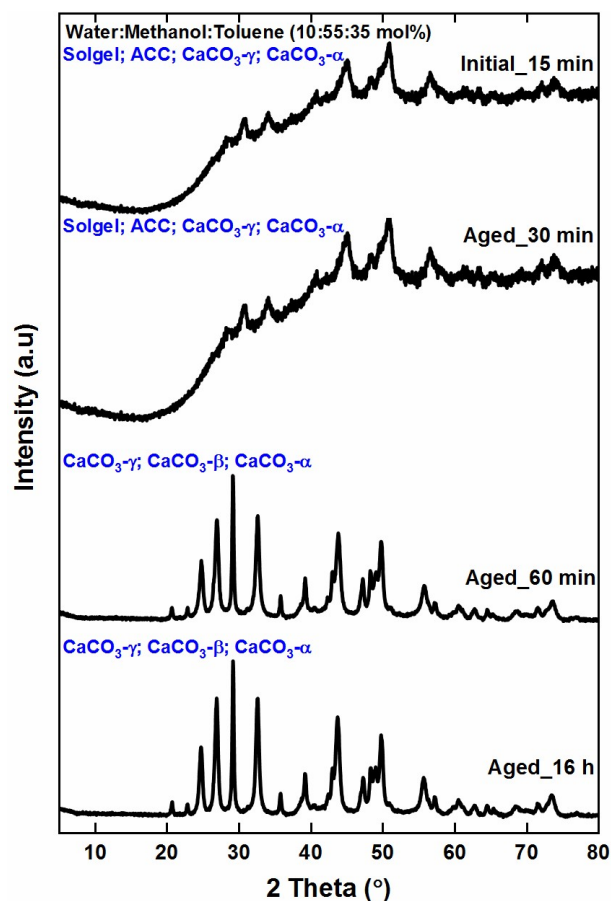

**Figure S4.** Time-resolved XRD following the aging of the post-carbonation product (15 mins to 16 hours) precipitated in a ternary water-methanol-toluene (10:55:35 mol%) system.

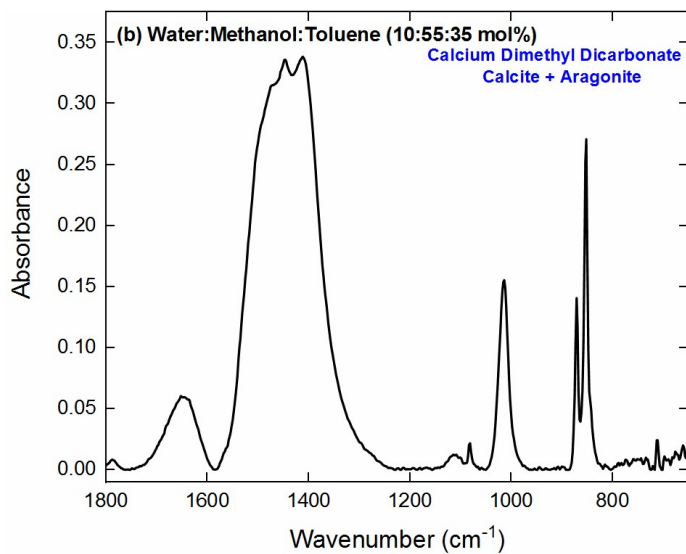

**Figure S5.** Mid-IR spectrum of the aged (60 hours) post-carbonation products for the water-methanol-toluene system. shows a mixture of calcite and aragonite.

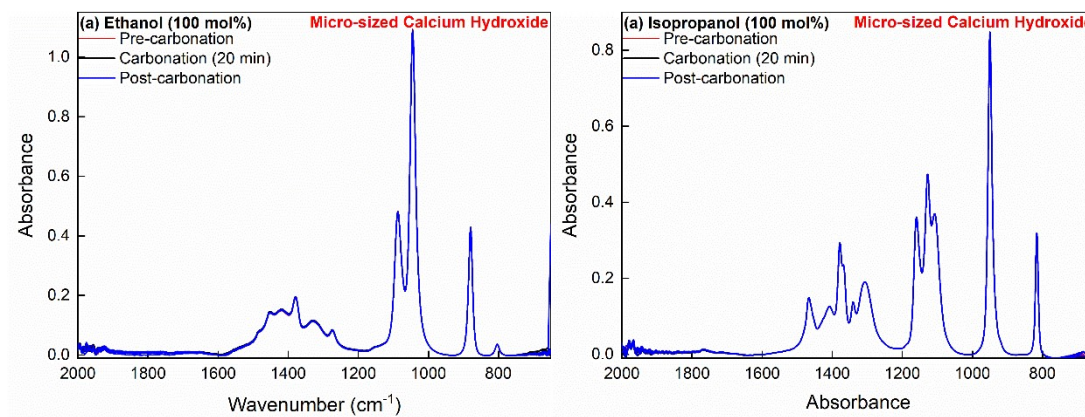

**Figure S6.** Mid-IR of micro-sized  $\text{Ca}(\text{OH})_2$  carbonation in pure (a) ethanol (product – no conversion) and (b) isopropanol (product – no conversion).

## REFERENCES

1. S. Y. Chang, T. A. Kathyola, E. A. Willneff, C. J. Willis, P. Wilson, P. J. Dowding, G. Cibi, A. B. Kroner, E. J. Shotton and S. L. M. Schroeder, *Reaction Chemistry & Engineering*, 2019, **4**, 679-687.
2. T. A. Kathyola, S.-Y. Chang, E. A. Willneff, C. J. Willis, G. Cibi, P. Wilson, A. B. Kroner, E. J. Shotton, P. J. Dowding and S. L. M. Schroeder, *Industrial & Engineering Chemistry Research*, 2023, **62**, 16198-16206.
